# Supplementary material for: Comprehensive hemocompatibility analysis on the application of diamond-like carbon to ePTFE artificial vascular prosthesis
Source: PubMed Central journal article supplement (PMC10209052; doi:10.1038/s41598-023-35594-7), 2023-05-24
Supplement: 41598_2023_35594_MOESM2_ESM.pdf [file 41598_2023_35594_MOESM2_ESM.pdf]

## Supplemental Figure S1. Methods of Tensile Test.

A tensile test of ePTFE sheet (0.1 mm thickness) was performed with Load testing machine (IMADA Ltd., Aichi, JAPAN). The pulling speed was 10mm/min. DLC was coated with argon plasma chemical Vapor deposition system. The deposition conditions for ePTFE sheets were as follows; voltage, 500V; argon gas introduction at 20ccm; ultimate vacuum pressure, 0.2Pa. The processing time and resulted DLC thickness is as follows; 4 min, 20 nm; 20 min, 100 nm; 60 min, 200 nm.

# Results of Tensile test

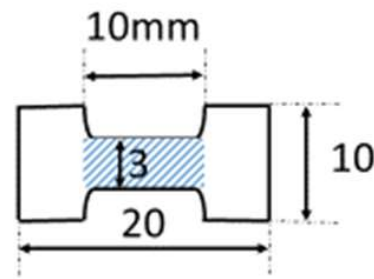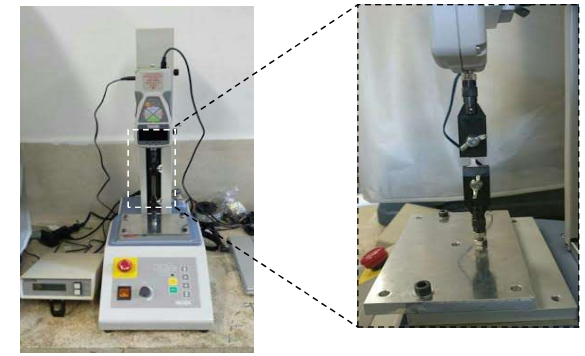

## (SEM Observation)

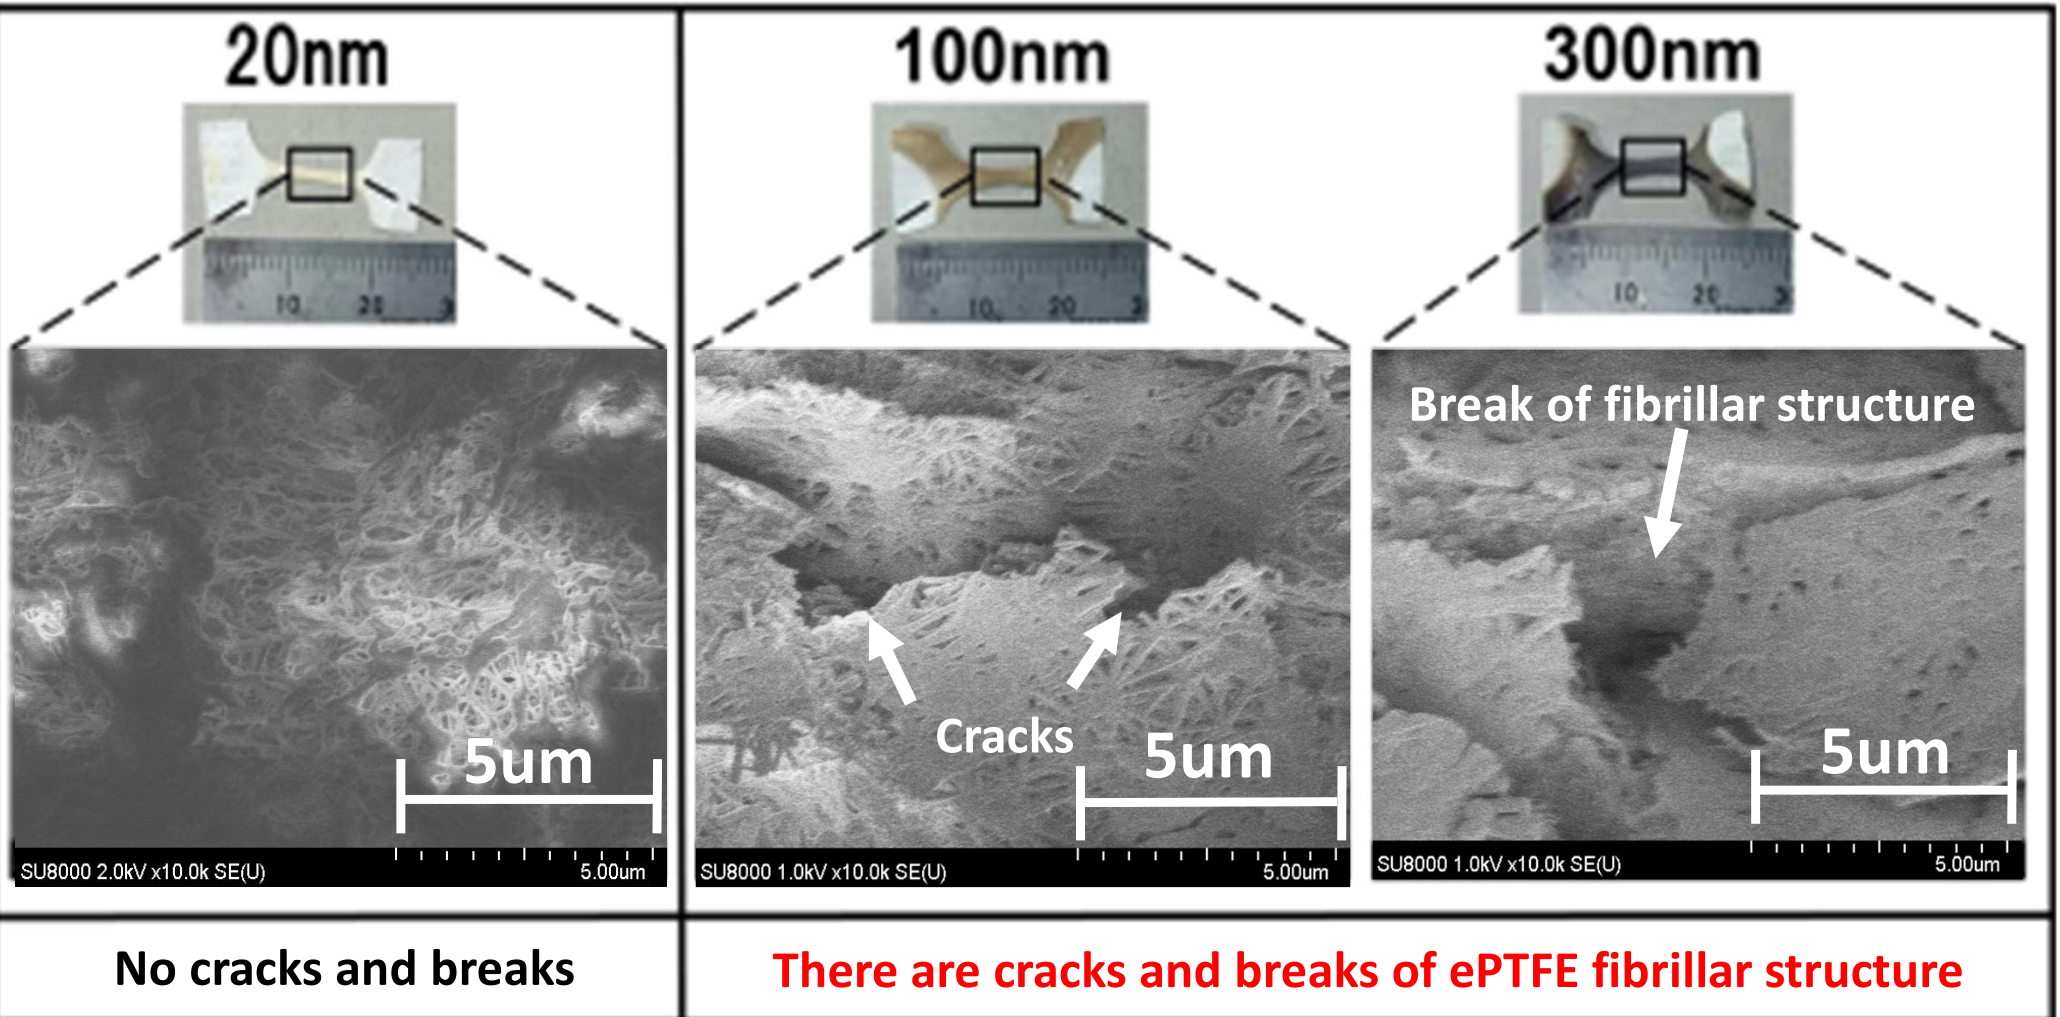

20 nm thickness DLC has better stability for mechanical loading than 100 nm thickness or 200 nm thickness DLC
