# Supplementary material for: Comprehensive hemocompatibility analysis on the application of diamond-like carbon to ePTFE artificial vascular prosthesis
Source: PubMed Central journal article supplement (PMC10209052; doi:10.1038/s41598-023-35594-7), 2023-05-24
Supplement: 41598_2023_35594_MOESM3_ESM.pdf [file 41598_2023_35594_MOESM3_ESM.pdf]

**Supplemental Table S1. Results of Shapiro-Wilk test and Kolmogorov-Smirnov test.**

## Shapiro-Wilk test

|                                  | Control           | DLC               |
|----------------------------------|-------------------|-------------------|
| Albumin test (Graft)             | Passed (P=0.8012) | Not (P=0.0162)    |
| Fibrinogen test (Graft)          | Passed (P=0.5443) | Passed (P=0.4088) |
| Platelet test (Sheet)            | Passed (P=0.638)  | Not (P=0.0244)    |
| Platelet test (Graft)            | Not (P=0.0002)    | Passed (P=0.181)  |
| Water contact angle test (Sheet) | Passed (P=0.0563) | Passed (P=0.5031) |

## Kolmogorov-Smirnov test

|                                  | Control           | DLC               |
|----------------------------------|-------------------|-------------------|
| Albumin test (Graft)             | Passed (P>0.1000) | Not (P=0.0043)    |
| Fibrinogen test (Graft)          | Passed (P>0.100)  | Passed (P>0.100)  |
| Platelet test (Sheet)            | Passed (P>0.100)  | Passed (P=0.0774) |
| Platelet test (Graft)            | Passed (P>0.100)  | Passed (P>0.100)  |
| Water contact angle test (Sheet) | Not (P=0.0318)    | Passed (P>0.100)  |
